# Supplementary material for: Green controllable synthesis of Au–Ag alloy nanoparticles using Chinese wolfberry fruit extract and their tunable photocatalytic activity
Source: Royal Society of Chemistry journal article supplement (doi:10.1039/c7ra13650a), 2018-01-01
Supplement: c7ra13650a1.pdf [file c7ra13650a1.pdf]

## Supplementary information

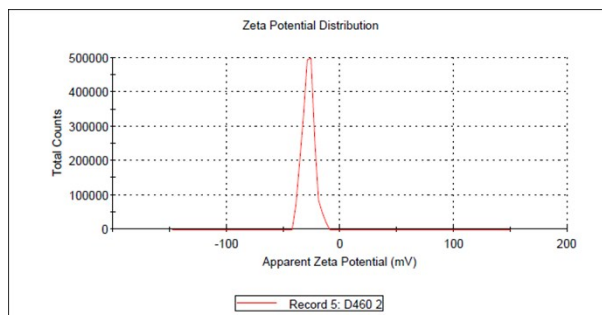

**Fig. S1.** Zeta potential distribution of Au-Ag alloy NPs

**Table S1**

The concentration of Au element and Ag element in Au-Ag alloy NPs synthesized at different synthesis times at the  $\text{Au}^{3+}/\text{Ag}^+$  molar ratio of 1:3.5 in raw materials. (ICP)

| Synthesis Time (min) | Au Concentration (mg/L) | Ag Concentration (mg/L) |
|----------------------|-------------------------|-------------------------|
| 0*                   | 2.81                    | 5.40                    |
| 0.2                  | 2.80                    | 0.83                    |
| 5                    | 2.80                    | 1.54                    |
| 60                   | 2.79                    | 4.59                    |

\* The concentrations of Au ions and Ag ions in raw materials were obtained by calculation.

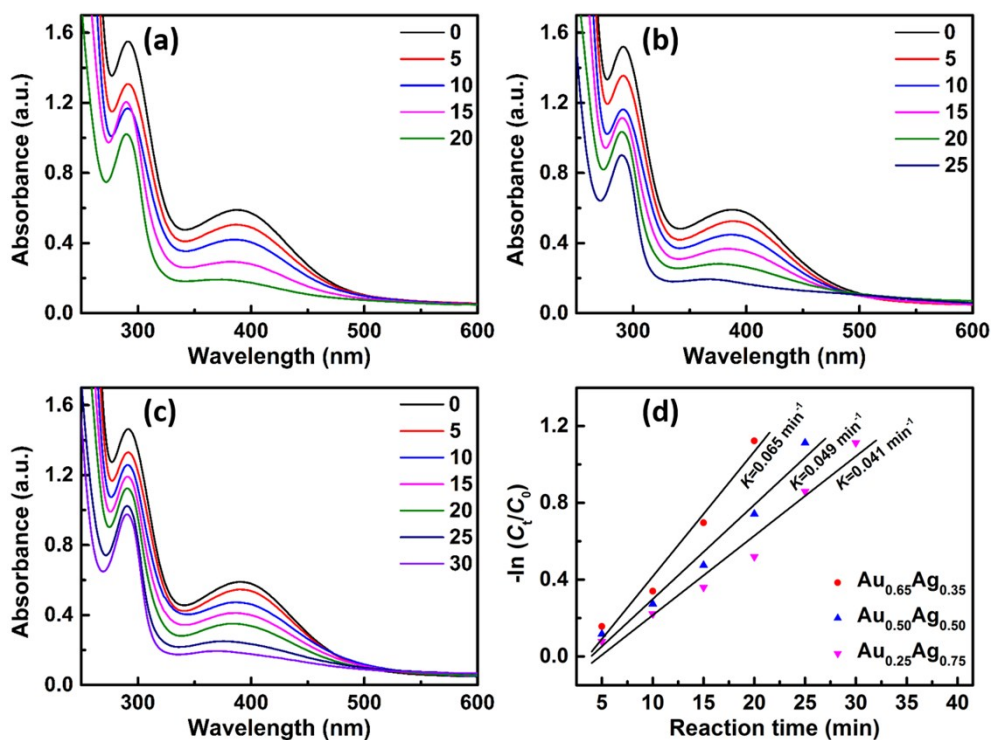

**Fig. S2.** UV-vis absorption spectra of the reduction of 3-nitrophenol solution using 500  $\mu\text{L}$  of different Au-Ag alloy NPs hydrosol as photocatalysts. (a)  $\text{Au}_{0.65}\text{Ag}_{0.35}$ ; (b)  $\text{Au}_{0.50}\text{Ag}_{0.50}$ ; (c)  $\text{Au}_{0.25}\text{Ag}_{0.75}$ . (d) The plot of  $-\ln(C_t/C_0)$  versus the reaction time based on different photocatalysts.

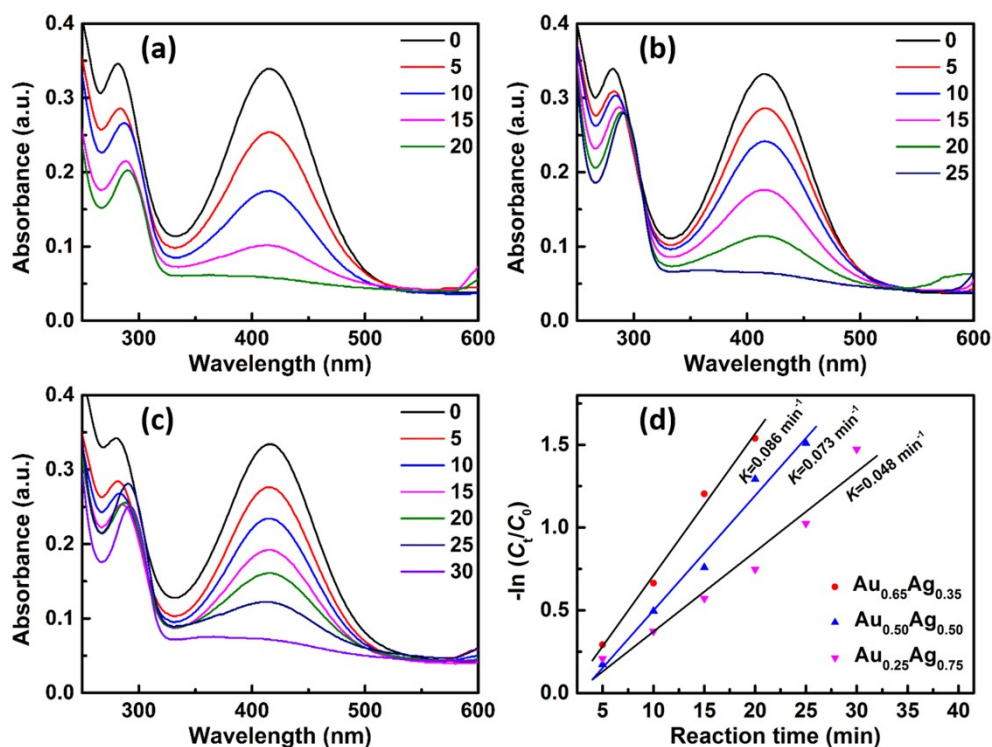

**Fig. S3.** UV-vis absorption spectra of the reduction of 2-nitrophenol solution using 500  $\mu$ L of different Au-Ag alloy NPs hydrosol as photocatalysts. (a)  $\text{Au}_{0.65}\text{Ag}_{0.35}$ ; (b)  $\text{Au}_{0.50}\text{Ag}_{0.50}$ ; (c)  $\text{Au}_{0.25}\text{Ag}_{0.75}$ . (d) The plot of  $-\ln(C_t/C_0)$  versus the reaction time based on different photocatalysts.

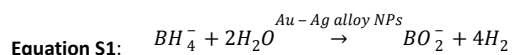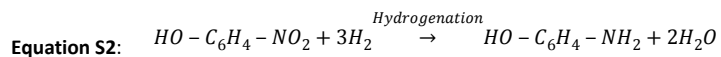

**Table S2**

The SPR wavelength, the average size, and the rate constant data for Au-Ag alloy NPs obtained at different synthesis parameters.

| Sample                             | SPR Wavelength (nm) | Average Size (nm) | Rate constant for the conversion of 4-NP to 4-AP $K_{4\text{-NP}}$ ( $\text{min}^{-1}$ ) | $\text{Au}^{3+}/\text{Ag}^+$ molar ratio in raw materials | Synthesis time (min) |
|------------------------------------|---------------------|-------------------|------------------------------------------------------------------------------------------|-----------------------------------------------------------|----------------------|
| $\text{Au}_{0.65}\text{Ag}_{0.35}$ | 490                 | $7.1 \pm 0.8$     | 0.135                                                                                    | 1:1                                                       | 2                    |
| $\text{Au}_{0.50}\text{Ag}_{0.50}$ | 460                 | $8.0 \pm 1.4$     | 0.111                                                                                    | 1:3.5                                                     | 5                    |
| $\text{Au}_{0.25}\text{Ag}_{0.75}$ | 430                 | $10.9 \pm 1.4$    | 0.086                                                                                    | 1:5                                                       | 15                   |
